# Supplementary material for: Solution-processed novel core–shell n–p heterojunction and its ultrafast UV photodetection properties
Source: Royal Society of Chemistry journal article supplement (doi:10.1039/c2ra21518g), 2012-01-01
Supplement: c2ra21518g.pdf [file c2ra21518g.pdf]

# **Solution-processed novel core-shell n-p heterojunction and its ultrafast UV photodetection properties**

**Shrabani Panigrahi and Durga Basak**

Department of Solid State Physics, Indian Association for the Cultivation of Science,

Jadavpur, Kolkata 700032, India

Email: [sspdb@iacs.res.in](mailto:sspdb@iacs.res.in)

Fax : (91)-(33) 24732805

**Supporting Information**

**Supporting Figures:**

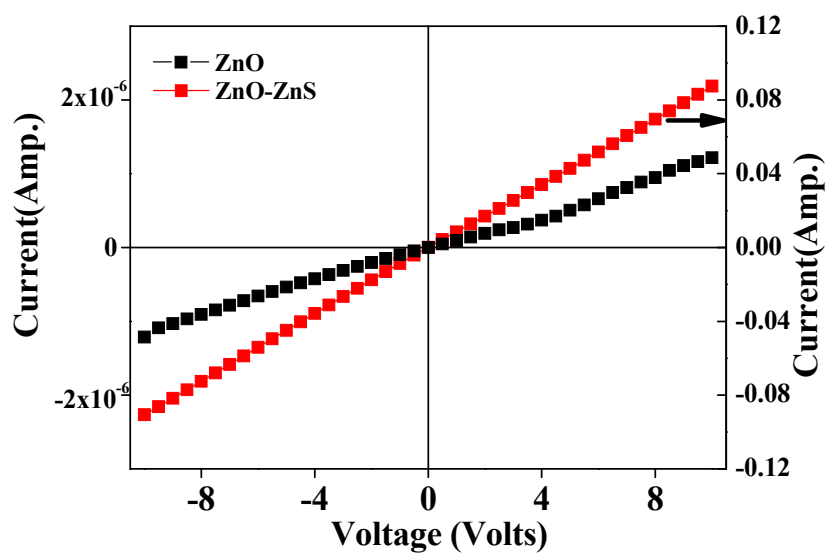

**Figure S1:** Current-voltage (I-V) characteristics of ITO/ZnO and ITO/ZnO/ZnS NRs arrays.

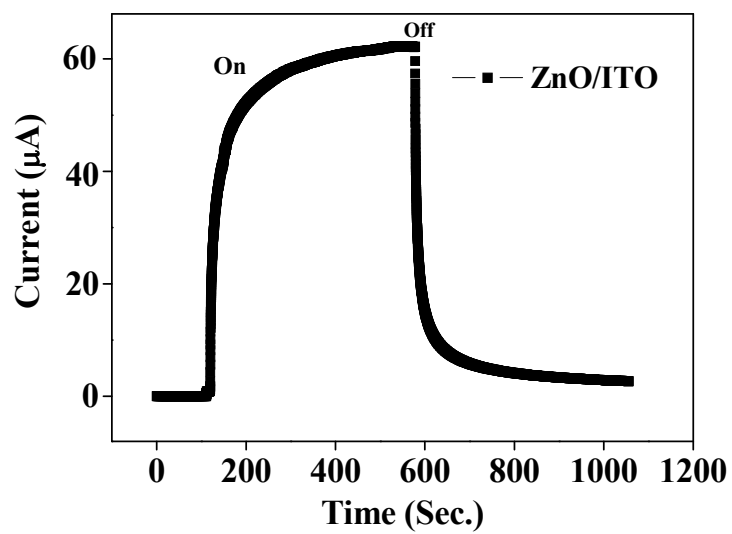

**Figure S2:** Photocurrent spectra of ITO/ZnO NRs arrays heterojunction.
